# 1 EEG microstate dynamics indicate a U-shaped path to propofol- 2 induced loss of consciousness

3 Fiorenzo Artoni<sup>1</sup>, Julien Maillard<sup>4</sup>, Juliane Britz<sup>3,2</sup>, Martin Seeber<sup>1</sup>, Christopher Lysakowski<sup>4</sup>, Lucie  
4 Bréchet<sup>2,1</sup>, Martin R. Tramèr<sup>4</sup>, Christoph M. Michel<sup>\*1,2</sup>

5 <sup>1</sup> Functional Brain Mapping Laboratory, Department of Basic Neurosciences, University of  
6 Geneva, Campus Biotech, Switzerland

7 <sup>2</sup> CIBM Center for Biomedical Imaging, Switzerland

8 <sup>3</sup> Department of Psychology, University of Fribourg, Fribourg, Switzerland

9 <sup>4</sup> Division of Anesthesiology, Department of Anesthesiology, Clinical Pharmacology, Intensive  
10 Care and Emergency Medicine, Geneva University Hospitals, Geneva, Switzerland

11 **Email:** [\\*christoph.michel@unige.ch](mailto:*christoph.michel@unige.ch); [fiorenzo.artoni@unige.ch](mailto:fiorenzo.artoni@unige.ch)

12

## 13 **Abstract**

14 It is commonly believed that the stream of consciousness is not continuous but parsed into transient  
15 brain states manifesting themselves as discrete spatiotemporal patterns of global neuronal activity.  
16 Electroencephalographical (EEG) microstates are proposed as the neurophysiological correlates  
17 of these transiently stable brain states that last for fractions of seconds. To further understand the  
18 link between EEG microstate dynamics and consciousness, we continuously recorded high-density  
19 EEG in 23 surgical patients from their awake state to unconsciousness, induced by step-wise  
20 increasing concentrations of the intravenous anesthetic propofol. Besides the conventional  
21 parameters of microstate dynamics, we introduce a new method that estimates the complexity of  
22 microstate sequences. The brain activity under the surgical anesthesia showed a decreased  
23 sequence complexity of the stereotypical microstates, which became sparser and longer-lasting.  
24 However, we observed an initial increase in microstates' temporal dynamics and complexity with  
25 increasing depth of sedation leading to a distinctive "U-shape" that may be linked to the paradoxical  
26 excitation induced by moderate levels of propofol. Our results support the idea that the brain is in  
27 a metastable state under normal conditions, balancing between order and chaos in order to flexibly  
28 switch from one state to another. The temporal dynamics of EEG microstates indicate changes of  
29 this critical balance between stability and transition that lead to altered states of consciousness.

30 **Keywords:** Propofol, General Anesthesia, EEG, Microstates, Lempel-Ziv Complexity

## 31 **Highlights:**

- 32 • EEG microstates capture discrete spatiotemporal patterns of global neuronal activity
- 33 • We studied their temporal dynamics in relation to different states of consciousness
- 34 • We introduce a new method to estimate the complexity of microstates sequences
- 35 • With moderate sedation complexity increases then decreases with full sedation
- 36 • Complexity of microstate sequences is sensitive to altered states of consciousness

37

## 1 Introduction

2

3 Spontaneous mental activity is discontinuous and can be parsed into a series of conscious states  
4 manifesting themselves as discrete spatiotemporal patterns of global neuronal activity. Terms such  
5 as "pulses of consciousness" (James, 2007), "perceptual frames" (Efron, 1970), "neuronal  
6 workspace" (Baars, 1997; Dehaene et al., 1998), "heteroclinic channel" (Rabinovich et al., 2001)  
7 or "structure flow on manifolds" (Huys et al., 2014) describe the various concepts of parcellation of  
8 consciousness into sequential episodes - for reviews see (Deco et al., 2011; Meehan and Bressler,  
9 2012; Michel and Koenig, 2018). For example, the neuronal workspace model suggests that  
10 discrete large-scale spatiotemporal neural activity patterns are transiently formed, remain for a  
11 certain amount of time, and then rapidly transition to a new co-activation pattern (Baars, 1997;  
12 Baars, 2002b; Dehaene et al., 2003). This model posits that only one global state exists at any  
13 moment in time and that conscious mentation emerges by the serial appearance of discrete states  
14 (Seth and Baars, 2005). A very similar chunking principle underlies the concept of "heteroclinic  
15 channels" (Rabinovich et al., 2001) that divide the mental activity into a chain of transient,  
16 metastable states. Metastability is a crucial principle that allows a system to spontaneously switch  
17 from one coordinated brain state to another, even in the absence of input (Deco and Jirsa, 2012;  
18 Jirsa et al., 1998; Tognoli and Kelso, 2014). Such flexible dynamics are important since conscious  
19 experiences are related to a rich and diverse repertoire of functional states which need to stabilize  
20 order and disorder, as unbalanced brain states can cause alterations in the global state of  
21 consciousness.

22 These brief periods of stable brain states switch from one to the other on the sub-second  
23 scale. Many behavioural studies have shown that the duration needed for conscious experience is  
24 in the range of 100 ms (Dehaene et al., 2003; Efron, 1970; Libet, 1981). On a neuronal level, similar  
25 durations have been measured for synchronous thalamocortical activity (Llinas and Ribary, 1998).  
26 By recording cortical event-related potentials in a monkey during a visuomotor pattern  
27 discrimination task, Ding et al. (Ding et al., 2000) discriminated three different coordination states,  
28 each lasting around 100 ms with quick transitions between them. Laminar recordings in monkeys  
29 revealed transient beta bursts lasting about 150 ms (Lundqvist et al., 2016) related to memory  
30 encoding and decoding processes (Sherman et al., 2016). In human EEG and  
31 magnetoencephalographic (MEG) resting-state recordings, periods of oscillation bursts lasting  
32 around 200 ms have been described in the alpha (Williamson et al., 1996) and beta-bands (Seedat  
33 et al., 2020). Hidden Markov Models on MEG resting-state activity revealed short-lived transient  
34 brain states lasting around 50-100 ms, with spatially distinct power and phase-coupling in specific  
35 frequency bands (Vidaurre et al., 2018). Recently, using measures of entropy and hierarchy of  
36 functional magnetic resonance imaging (fMRI) signals, Deco et al. (Deco et al., 2019) demonstrated  
37 that the optimal timescale for discovering relevant spatiotemporal structures of brain signals is  
38 around 200 ms.

39 Overall, ample evidence indicates that spontaneous brain activity is parcelled into blocks  
40 of stable brain states that last around 100-200 ms, potentially representing the basic building blocks  
41 of consciousness. An increasingly popular method to capture these transient brain states are the  
42 EEG microstates, which have been suggested to represent the neural correlates of the elementary  
43 building blocks of the contents of consciousness, the "atoms of thought" (Baars, 2002a; Bressler  
44 and Kelso, 2001; Changeux and Michel, 2004; Lehmann et al., 1987). The concept of EEG  
45 microstates was developed three decades ago from the purely phenomenological observation that  
46 the head-surface voltage topographies recorded with multichannel EEG do not randomly change  
47 in space and time. Rather, a small set of prototypical topographies exist that remain quasi-stable

1 for about 50-150 ms and rapidly transition from one to the other (Creaser et al., 2021; Lehmann et  
2 al., 1987). These transiently stable topographies emerge from the temporary synchronized  
3 neuronal activity of large-scale networks (Koenig et al., 2002; Michel and Koenig, 2018).

4 Several studies showed the stability of the dominant microstate topographies within and  
5 across subjects, independent of age and gender (Jabès et al., 2021; Koenig et al., 2002; Tomescu  
6 et al., 2018; Zanesco et al., 2020). However, the temporal dynamics of the microstates, such as  
7 frequency of occurrence, duration, or transition probabilities, are susceptible to the momentary  
8 state of the brain. For example, instructing participants to focus their thoughts on specific  
9 autobiographical memories, on previously seen objects, on the definition of particular words, or  
10 arithmetic calculations selectively influence duration or occurrence of specific microstates (Bréchet  
11 et al., 2019; Milz et al., 2016; Seitzman et al., 2017). Also, meditation leads to the alteration of the  
12 presence of distinct microstates (Brechet et al., 2021; Faber et al., 2017; Panda et al., 2016;  
13 Zanesco et al., 2021). Most importantly, different neuropsychiatric and neurological diseases,  
14 particularly schizophrenia, have been shown to alter the temporal characteristics of specific EEG  
15 microstates (Andreou et al., 2014; Kindler et al., 2011; Lehmann et al., 2005; Rieger et al., 2016;  
16 Strelets et al., 2003; Tomescu et al., 2015).

17 While these and many other studies demonstrated the sensitivity of EEG microstate  
18 dynamics to the momentary mental or cognitive state of the healthy and the pathological brain, little  
19 is known about the changes of EEG microstates due to altered states of consciousness such as  
20 sleep, anesthesia, or clinical conditions like coma or minimally conscious states. If EEG microstates  
21 are indeed the neural correlates of the elementary building blocks of the contents of consciousness,  
22 then any alteration of the consciousness level should modulate EEG microstates, either in terms of  
23 the diversity of states, the duration of a given state, or the syntax of transition between different  
24 microstates. The few existing studies indicate such modulations. Sleep as compared to  
25 wakefulness did not alter the topography of the most dominant microstates, but in a deep sleep  
26 (stage N3), the duration of all microstates increased (Brodbeck et al., 2012). A more recent study  
27 with high-density EEG source imaging demonstrated an increased presence of two EEG  
28 microstates during non-rapid eye movement (NREM) sleep compared to wakefulness, associated  
29 with low-frequency activity in the medial frontal and the occipital/thalamic regions, respectively  
30 (Bréchet et al., 2020). Another recent study (Gui et al., 2020) used the EEG microstate approach  
31 to assess residual cognitive functions in unresponsive patients. The authors showed a reduction of  
32 microstates that are thought to reflect higher cognitive functions, while microstates associated with  
33 basic sensory functions were increased compared to controls. They also showed that the duration  
34 and occurrence of the “cognitive” microstates reflected the strength of residual consciousness and  
35 predicted recovery in these patients. Similarly, the ability of microstate temporal parameters to  
36 predict recovery from the coma has been demonstrated in (Stefan et al., 2018).

37 To the best of our knowledge, only one study used the EEG microstate approach to study  
38 the effects of mild to moderate sedation induced by anesthetics (Shi et al., 2020), but did not  
39 examine the different loss of consciousness conditions. The authors showed that one specific  
40 microstate became salient during moderate sedation induced by propofol in increased time  
41 coverage and occurrence.

42 In this study, we investigated the spatio-temporal properties of EEG microstates by  
43 following surgical patients from the awake condition to loss of consciousness and further to surgical  
44 anesthesia. As an anesthetic, we used intravenous propofol, which is a widely used, short-acting  
45 GABA receptor agonist. To provide surgical anesthesia, we used supplemental sufentanil, which is  
46 a strong opioid, and rocuronium, which is a muscle relaxant. We aimed to highlight the difference  
47 between fully alert/baseline compared to surgical anesthesia conditions and the actual correlations

1 of brain dynamics during that transition to advance further our understanding of conscious and  
2 unconscious states of the human brain. We also introduce a new method to evaluate the temporal  
3 sequence of EEG microstates, based on the algorithmic Lempel-Ziv complexity index which,  
4 contrary to what has been described previously (Casali et al., 2013; Schartner et al., 2015), is based  
5 on the temporal dynamics of the whole scalp potential field rather than binarized EEG single-  
6 channel envelopes. The measure is holistic as it involves all EEG channels. It is reference-free as  
7 it is based on the spatial configuration of the potential field, in contrast to single-channel waveform  
8 analysis (Michel and Murray, 2012). Other authors have computed the Lempel Ziv complexity (PCI)  
9 of TMS-induced EEG activation patterns to assess the level of consciousness (Casali et al., 2013;  
10 Casarotto et al., 2016; Comolatti et al., 2019). It has been proposed that this index quantifies the  
11 brain's ability of information integration after stimulation (Tononi et al., 2016). The need for TMS  
12 stimulation to determine the evoked EEG complexity arises however from the lack of control of PCI  
13 when applied directly on resting state data as even a tiny fraction of noise would increase entropy,  
14 reducing the generalizability of the measure. By relying on the very well-established microstate  
15 extraction procedure, our EEG complexity measure can be applied to resting state data without the  
16 need for external stimulation and allows to further assess how the different levels of  
17 pharmacologically-induced, altered states of consciousness influence the complexity of the  
18 microstate temporal dynamics.

## 19 **Materials and Methods**

### 20 **A. Experiment protocol**

21  
22 Twenty-three patients scheduled for minor elective surgery (ear-nose-throat/plastic surgery) were  
23 included at the time of the anesthesia consultation after giving written informed consent. The study  
24 protocol was approved by the Ethics Committee of Geneva University Hospitals (CER 12-280).  
25 None suffered from current or prior neurological or psychiatric impairments. The complete list of  
26 inclusion and exclusion criteria is available in the **Appendix**. The mean age of participants was 30  
27 years (range 20-47 years). No monetary compensation was offered.

28  
29 The patients fasted for at least six hours before anesthesia for solids and two hours for  
30 clear liquids (Smith et al., 2011). They did not receive any preoperative anxiolysis. On arrival in the  
31 operating theatre, standard non-invasive monitoring was installed, including a three-lead  
32 electrocardiogram (ECG), blood pressure cuff, end-tidal CO<sub>2</sub>, and peripheral pulse oximetry.  
33 Oxygen (100%) was administered through a facemask throughout the study period.

34 Propofol, prepared by the anesthesia team, was administered using a Target Controlled  
35 Infusion (TCI) device (Base Primea, Fresenius-Vial, Brezins, France) and the pharmacokinetic-  
36 pharmacodynamic (PK/PD) model by Schnider et al. (Schnider et al., 1999). The TCI device  
37 estimates the propofol concentrations in the plasma and at the effect-site (brain). The initially  
38 chosen effect-site concentration was 0.5 µg ml<sup>-1</sup>. We assumed that the equilibration of the blood-  
39 brain concentrations ("steady-state") was achieved within 5 minutes after identical plasma and  
40 cerebral concentrations appeared on the TCI device screen. Effect-site concentrations were then  
41 increased stepwise by 1.0 µg ml<sup>-1</sup> until 2.5 µg ml<sup>-1</sup> and then by 0.5 µg ml<sup>-1</sup> until loss of consciousness  
42 (LOC). After each increase, the "steady-state" was maintained for 5 minutes, and after this period,  
43 a five-minute EEG recording was done.

44 To estimate the degree of alertness, from fully alert to surgical anesthesia, we used a  
45 modified Observer's Assessment of Alertness/Sedation (OAA/S) scale. The original OAA/S scale  
46 was developed to evaluate the depth of sedation clinically and to identify the time point of LOC in  
47 patients receiving sedative drugs (Chernik et al., 1990). The 5-point scale ranges from 5 (fully

| Response                                                | Speech                        | Facial expression             | Eyes                                            | Composite Score |
|---------------------------------------------------------|-------------------------------|-------------------------------|-------------------------------------------------|-----------------|
| Responds readily to name spoken in normal tone          | Normal                        | Normal                        | Clear, no ptosis                                | 5               |
| Lethargic response to name spoken in normal tone        | Mild slowing or thickening    | Mild relaxation               | Glazed or mild ptosis (less than half the eye)  | 4               |
| Responds only after name is called loudly or repeatedly | Slurring or prominent slowing | Marked relaxation (slack jaw) | Glazed and marked ptosis (half the eye or more) | 3               |
| Responds only after mild prodding or shaking            | Few recognizable words        |                               |                                                 | 2               |
| Does not respond to mild prodding or shaking            |                               |                               |                                                 | 1               |
| Does not respond to noxious stimulus                    |                               |                               |                                                 | 0               |

**Table 1. Observer Assessment of Alertness/Sedation (OAA/S) scale.** Correspondence between Response, Speech, Facial Expression, Eyes characteristics and Composite score according to the Observer Assessment of Alertness/Sedation (OAA/S) scale

1 awake = subject responds readily to name spoken in a normal tone, normal speech, normal facial  
 2 expression, no ptosis) to 1 (deep sedation = subject does not respond to mild prodding or shaking)  
 3 (**Table 1**). OAA/S 5 was called BASE (baseline), and LOC was defined as a score  $\leq 2$ . Increasing  
 4 depths of sedation from OAA/S 5 to OAA/S 1 were achieved exclusively with increasing effect-site  
 5 propofol concentrations and without any additional medication. However, as OAA/S 1 states  
 6 (subject not responding to mild prodding or shaking) does not ensure that the subject does not  
 7 react to active facemask ventilation (which may interfere with EEG recordings) and does not  
 8 correspond to surgical anesthesia, we added a further state, called DEEP. DEEP was achieved in  
 9 further increasing the depth of sedation at OASS 1 through adding supplementary propofol to  
 10 eventually reach effect-site concentrations between 4 and 5.5 mcg/ml, and additionally, an  
 11 intravenous bolus dose of each, a strong opioid (sufentanil 0.2 mcg/kg) and a neuro-muscular  
 12 blocking agent (rocuronium 0.6 mg/kg). Rocuronium was administered to counteract a potential  
 13 sufentanil-related muscle rigidity and to facilitate oro-tracheal intubation. EEG recordings were  
 14 ended before oro-tracheal intubation.

15 During the anesthesia procedure, vital signs were continuously recorded using the  
 16 institutional computerized anesthesia record chart. They included heart rate, systolic, diastolic,  
 17 mean arterial blood pressure, oxygen saturation (pulsoxymetry), and end-tidal CO<sub>2</sub>. These  
 18 variables were not used for analyses. Neural correlates of propofol-induced anesthesia were  
 19 investigated by acquiring 64-channel electroencephalographic (EEG) data with active Ag/AgCl  
 20 electrodes (actiCap; BrainProducts) in an extended 10-10 System under the control of  
 21 neuroscientists (Oostenveld and Praamstra, 2001). Prior to the arrival in the operation room,  
 22 subjects were instructed to stay with closed eyes and to relax as much as possible. After a resting  
 23 period of 10 minutes, a baseline EEG (BASE) was recorded (5 minutes duration). The 5 minutes  
 24 EEG recording was repeated at each propofol state with a band pass filter between DC and 1000  
 25 Hz and was digitized at 5 kHz, with an online reference at FCz.

26



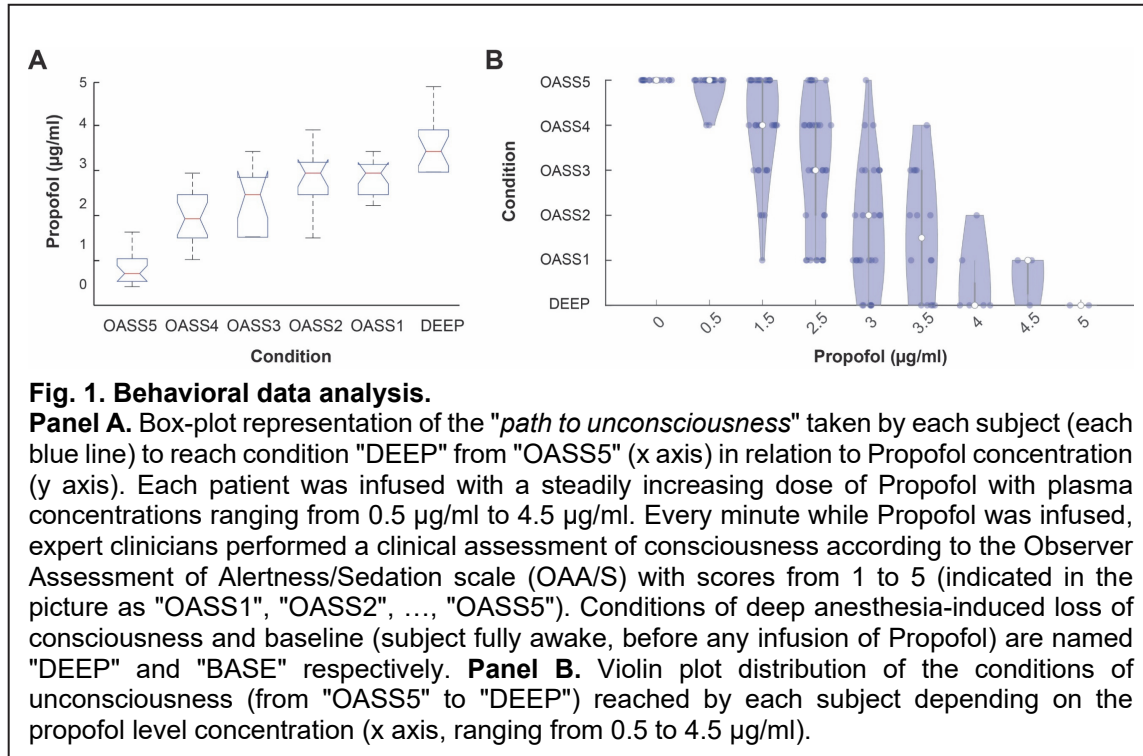

### 1 **B. The path to unconsciousness and surgical anesthesia**

2 Each dataset was annotated every minute with a level of sedation going from BASE to DEEP. Since  
3 starting from BASE, every subject reached LOC and eventually DEEP, it was possible to define a  
4 "path from consciousness (fully alert) to surgical anesthesia" as the series of conditions traversed  
5 by the subject. **Fig. 1** represents such a path for the subjects. **Fig. 1, Panel A** shows, for each  
6 condition, the distribution of propofol effect site concentrations across the whole population and  
7 within each condition. Each box plot shows the average distribution across the population, the  
8 values corresponding to the 25<sup>th</sup> and 75<sup>th</sup> percentile of the distribution, and the maximum and  
9 minimum values that are not outliers. Conversely, **Fig. 1, Panel B** represents the Violin distribution  
10 of conditions across the whole population with respect to the measured propofol effect-site  
11 concentrations.

12

### 13 **C. The first stage of data preprocessing**

14 Data were preprocessed with custom MATLAB scripts based on routines from the EEGLAB toolbox  
15 (Delorme and Makeig, 2004) and within Cartool (Brunet et al., 2011) in two stages (**Fig. 2**), following  
16 an increased-stability procedure also tested in previous works (Artoni et al., 2017). Within the first  
17 stage (**Fig. 2, STEP 1**), continuous data were processed using a Reliable Independent Component  
18 Analysis (RELICA) approach (Artoni et al., 2014) to remove artifacts and other non-neural noise  
19 sources, without any preliminary data dimensionality reduction (Artoni et al., 2018). To maximize  
20 both stability (Artoni et al., 2014) and dipolarity (Delorme et al., 2012) of Independent Components  
21 (ICs), raw data were first high-pass filtered using a zero-phase 1.2Hz, 24<sup>th</sup> order Chebyshev type  
22 II filter, then low-pass filtered using a zero-phase 45Hz, 70<sup>th</sup> order Chebyshev type II filter and  
23 resampled at 250Hz. Thanks to the rollover steepness of the filter, there was no need to perform a  
24 further 50Hz Comb Notch Filter. Channels having Kurtosis outside 5 standard deviations with

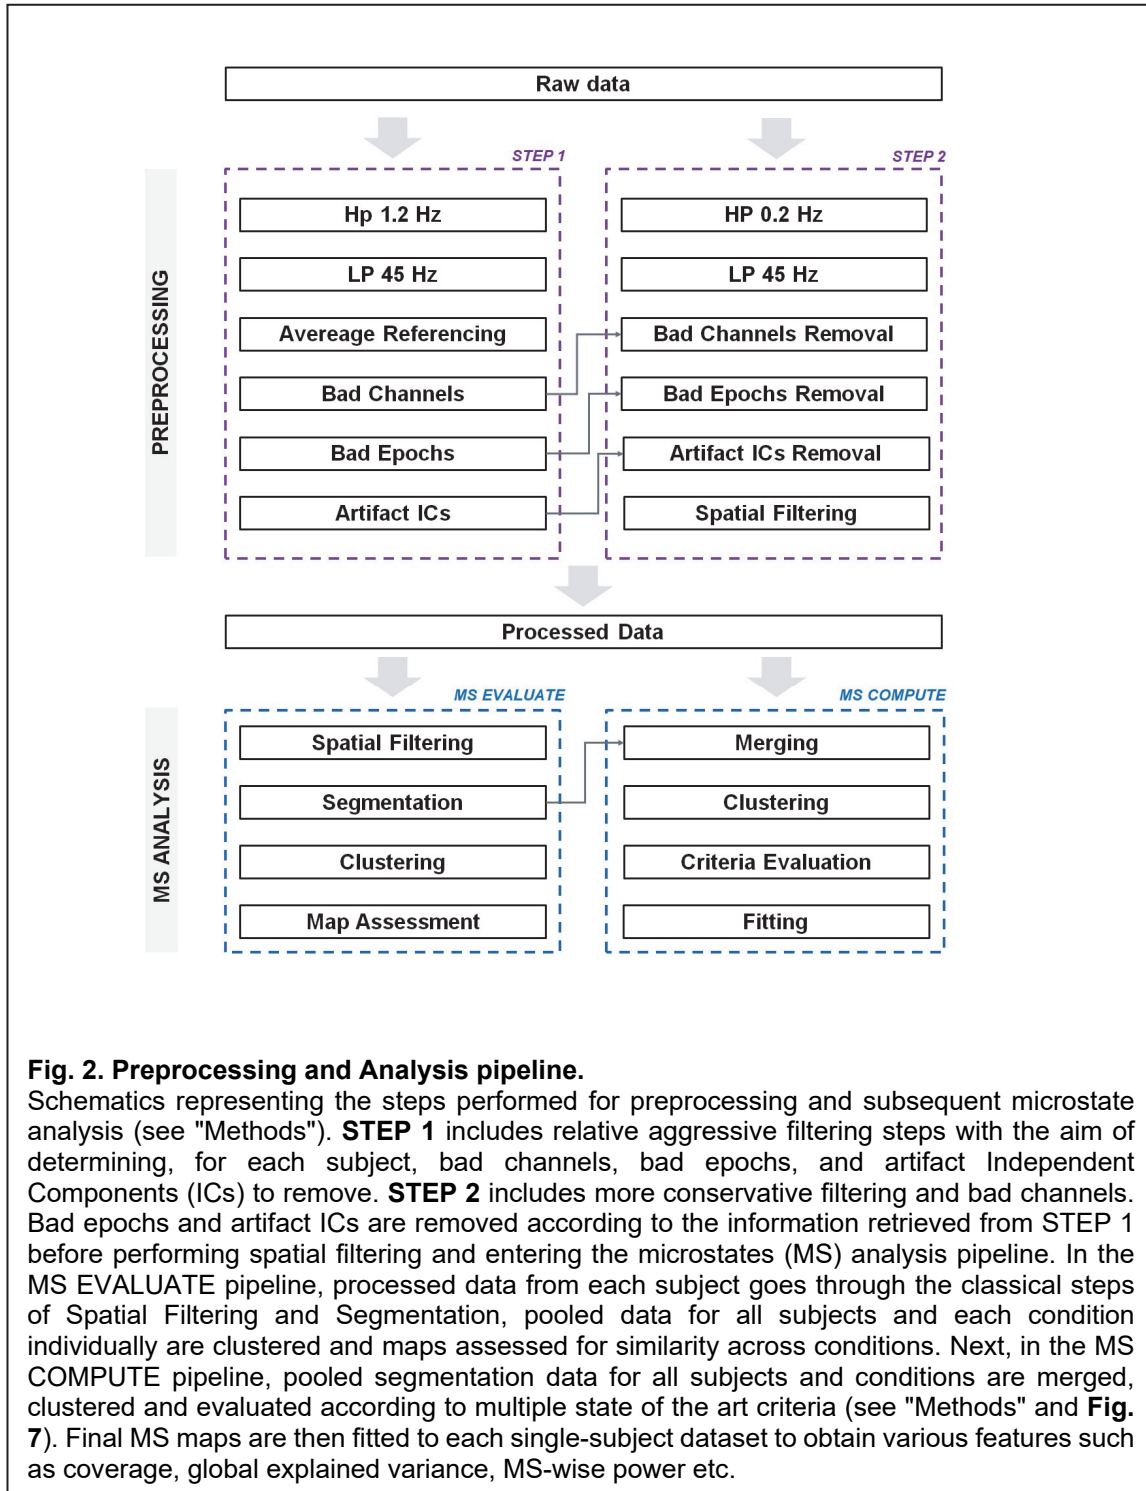

- 1 respect to other channels or having prominent prolonged artifacts as confirmed by visual inspection
- 2 were removed. Epochs with high-amplitude artifacts or high-frequency muscle noise were also
- 3 identified by visual inspection and removed. The remaining data were submitted to RELICA with
- 4 an AMICA core (Artoni et al., 2014) and 100 point-by-point Infomax ICA with a GPU-accelerated

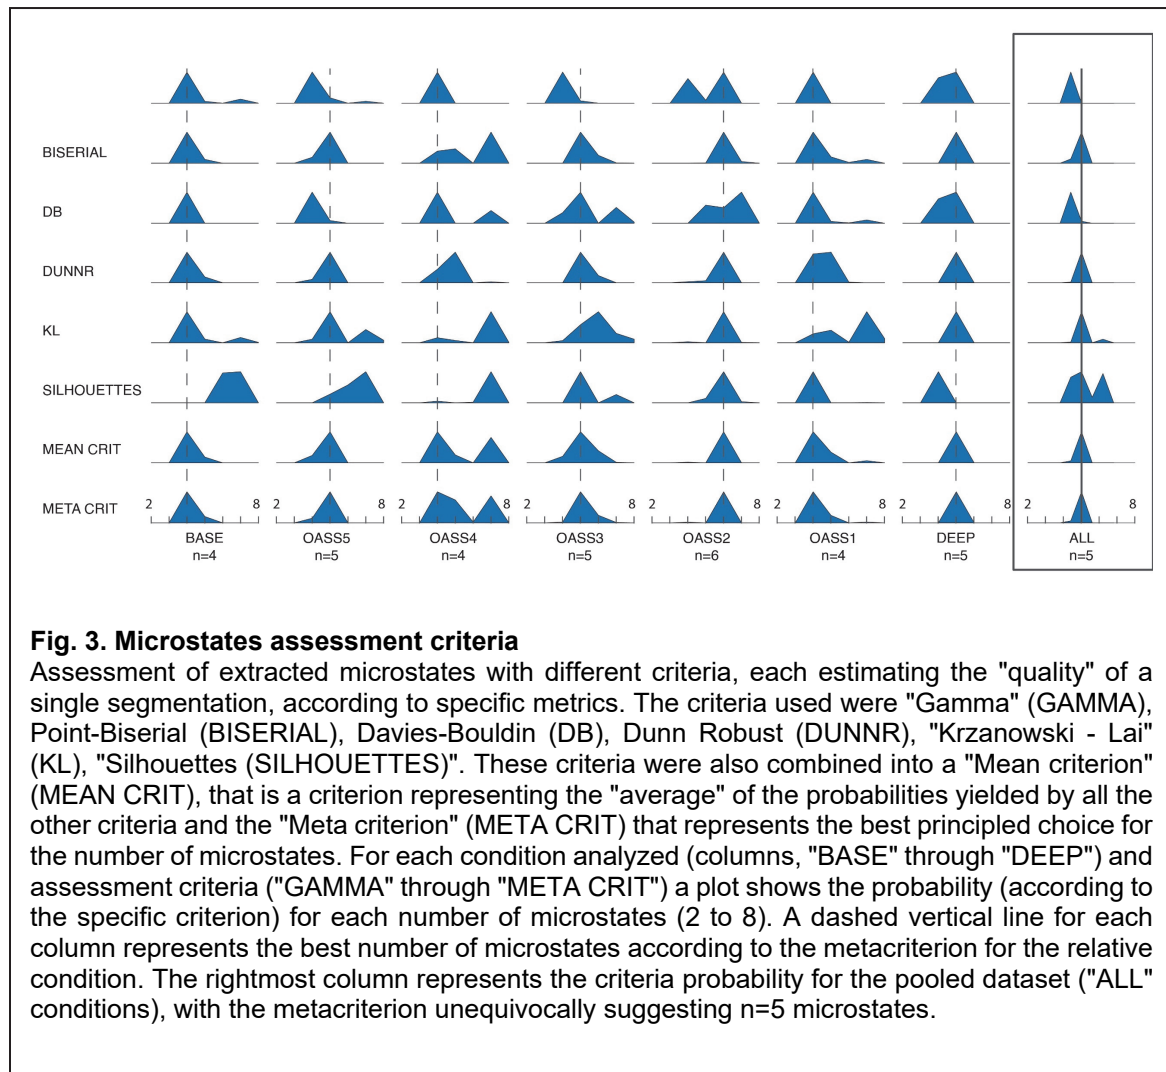

1 BeamICA implementation (Kothe and Makeig, 2013). Final ICA mixing and unmixing weights were  
 2 then collected.

3

#### 4 **D. The second stage of data preprocessing**

5 Within the second preprocessing stage (**Fig. 2, STEP 2**), raw data were high-passed using a zero-  
 6 phase 0.2Hz 24<sup>th</sup> order Chebyshev type II filter and a zero-phase 45Hz, 24<sup>th</sup> order Chebyshev type  
 7 II Low Pass filter and resampled at 250Hz. Bad channels and epochs already identified within the  
 8 first preprocessing stage were rejected, and data were carefully visually re-inspected for any  
 9 remaining artifacts. ICA unmixing weights computed within the first preprocessing stage were then  
 10 re-applied to the dataset, and source localization was performed using the Dipfit toolbox (Delorme  
 11 et al., 2012) within EEGLAB. Dipolar and stable ICs related to stereotyped artifacts such as eye  
 12 activity and neck muscle activity were removed from the data by back projecting the IC activation  
 13 data after zeroing out the columns of the mixing matrix corresponding to the artifact ICs. Missing  
 14 channels were interpolated, and clean data were spatially filtered within Cartool to improve the SNR  
 15 of the data (Michel and Brunet, 2019).

16



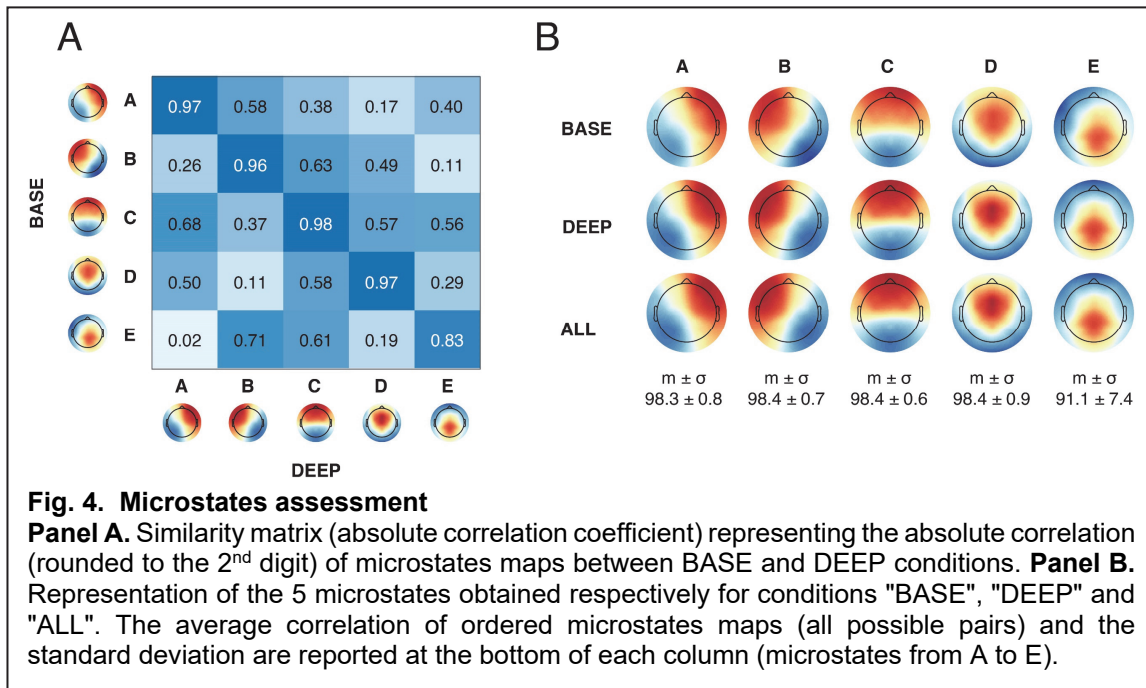

**Fig. 4. Microstates assessment**

**Panel A.** Similarity matrix (absolute correlation coefficient) representing the absolute correlation (rounded to the 2<sup>nd</sup> digit) of microstates maps between BASE and DEEP conditions. **Panel B.** Representation of the 5 microstates obtained respectively for conditions "BASE", "DEEP" and "ALL". The average correlation of ordered microstates maps (all possible pairs) and the standard deviation are reported at the bottom of each column (microstates from A to E).

### 1 **E. Extraction of microstates**

2 EEG microstate segmentation was performed using the standard procedure also described in  
 3 (Murray et al., 2008), while taking extra precautions to ensure the statistical reliability of all the  
 4 results. In fact, throughout all the analyses, excluded time epochs (beginnings and ends) were  
 5 treated as "boundaries", that is "gaps" in the data that could not be "crossed" by the analysis steps.  
 6 First, the Global Field Power (GFP) maxima were extracted from each participant's spontaneous  
 7 preprocessed EEG. For each condition and participant, the GFP peak maps (channel values at the  
 8 timestamp corresponding to the GFP peak) were extracted to ensure a high signal-to-noise ratio  
 9 (Koenig et al., 2002) and were clustered via modified k-means to extract distinct templates (Murray  
 10 et al., 2008; Pascual-Marqui et al., 1995). Within this step, the spatial correlation between each  
 11 GFP map and each template randomly generated was calculated while ignoring the polarity of  
 12 maps (Michel and Koenig, 2018).

13 Each template was iteratively updated by averaging the GFP maps that presented the  
 14 highest correlation with the template. At the same time, the Global Explained Variance (GEV) of  
 15 template maps was calculated, and the process was iterated until the stability of GEV was reached.  
 16 For each condition (BASE through DEEP), the optimal number of microstate classes was  
 17 determined using different criteria (**Fig. 3**), each estimating the "quality" of a single segmentation  
 18 according to specific metric, namely "Gamma", "Silhouettes", "Davies-Bouldin", "Point-Biserial",  
 19 "Dunn-Robust" and "Krzanowski-Lai" (KL), the optimum subsequently validated by a MetaCriterion  
 20 implemented and published with the Cartool toolbox and discussed in depth in (Bréchet et al.,  
 21 2019).

22 The dominant microstates were identified within each condition from the templates across  
 23 participants using a second modified k-means clustering step. Each clustering step was computed  
 24 100 times to maximize stability and to overcome the possible statistical instability of the  
 25 randomization procedure within the k-means algorithm (Murray et al., 2008). The spatial correlation  
 26 was finally computed between microstates across all conditions. Each microstate was labeled as

1 the name of the microstate in baseline with minimal topographical dissimilarity (i.e., highest spatial  
2 correlation).

### 4 **F. Assessment of the quality of microstates and fitting**

5 The topographical dissimilarity across different microstates both within each condition and across  
6 different conditions was also computed to ensure no "microstate splitting" occurred. **Fig. 4, Panel**  
7 **A** reports the topographical correlation values between DEEP and BASE microstates. Average and  
8 standard deviations of the spatial correlation of paired microstate maps across all conditions are  
9 finally reported at the bottom of **Fig. 4, Panel B**. Given the high correlation between paired maps  
10 across conditions and the similar assessment of the optimal number of microstates yielded by the  
11 meta-criterion, the data of all conditions were pooled (condition ALL) and the hitherto described  
12 analysis repeated as shown in **Fig. 2**.

13 Finally, spatial correlation between the templates identified at the group level (ALL) and  
14 those identified for each subject was computed using a temporal constraint (Segments Temporal  
15 Smoothing) of 6 samples (24 ms). EEG frames were labeled in a "winner-takes-all" strategy (Michel  
16 and Koenig, 2018) according to the group template it best corresponded to (no labeling was  
17 performed at correlations lower than 0.5), which generated the microstate sequence for further  
18 analysis.

### 20 **G. Extraction of microstates canonical features**

21 For each condition and each subject, the following microstate features were computed:

- 22 • Global explained variance (GEV), obtained for each microstate class, as the sum of the  
23 explained variances weighted by the Global Field Power at each time point, that is

$$24 \quad GEV = \frac{\sum_{t=1}^{t=tmax}(GFP^2 * ev)}{\sum_{t=1}^{t=tmax}(GFP^2)}$$

- 25 • Spatial correlation, obtained for each microstate class, as the mean spatial correlation of  
26 the microstate map with the GFP peak maps within the spatially filtered dataset. The spatial  
27 correlation between two maps is mathematically defined as  $C = \frac{\mathbf{u} \cdot \mathbf{v}}{\|\mathbf{u}\| \|\mathbf{v}\|}$  where  $\mathbf{u}$  and  $\mathbf{v}$   
28 represent the first and second map respectively and  $\|\cdot\|$  the  $l_2$  norm.
- 29 • Duration, obtained for each microstate by averaging the time said microstate is active (in a  
30 winner-takes-all fashion) before transitioning to another microstate.
- 31 • Density, computed for each microstate as the number of occurrences of said microstate  
32 per second of data.
- 33 • Coverage, computed for each microstate as the relative number of time points of the  
34 dataset covered by said microstate

### 36 **H. Statistical comparison of microstate features across conditions**

37 After rejecting the null hypothesis of data Normal distribution over each group using a Kolmogorov  
38 Smirnov test (significance set at  $\alpha = 0.05$ ), these measures were compared across conditions  
39 using a Kruskal Wallis test followed by a Tukey's Honest Significant Difference (HSD) criterion for  
40 post-hoc comparison. In the following, median (MED) and 95% confidence interval of the median  
41 (STM) are reported instead of the mean (AVG) and standard deviation (STD) whenever data did  
42 not follow a standard distribution. STE is reported as  $w (q_3 - q_1) / \sqrt{n}$  with  $w = 1.57$ ,  $q_3$  and  $q_1$  the  
43 75<sup>th</sup> and 25<sup>th</sup> percentile, respectively, and  $n$  the number of samples (Chambers et al., 1983). Violin  
44 plot distributions were also calculated by kernel density estimation with a Gaussian kernel to  
45 minimize the  $l_2$  mean integrated squared error (Silverman, 1986). Box plots with comparisons

1 across all conditions for the most significant measures (Density, Duration, Spatial Correlation) are  
2 represented in **Fig. 5**.

### 3 4 ***I. Checking for polarity inversions to test for nonlinearity***

5 After preliminary observations of the data, the possibility of a nonlinear path to unconsciousness  
6 was tested by computing for each microstate the relative normalized percentage difference of  
7 significant features (Density, Duration, Spatial Correlation) in OASS4 and DEEP conditions with  
8 respect to BASE (**Fig. 6**), each relative difference was statistically tested against a null  
9 distribution. An inversion of polarity between the first and second bar groups demonstrates a  
10 nonlinear path to unconsciousness.

### 11 12 ***K. Complexity analysis***

13 To compute the complexity of non-binarized sequences, we used the Lempel-Ziv-Markov chain  
14 algorithm (LZMA2) for lossless data compression (Pavlov, 2013a) with maximum compression  
15 level, 64MB dictionary, 64 FastBytes, BT4 MatchFinder, BCJ2 Filter (Pavlov, 2013b). The  
16 Microstate Lempel-Ziv Complexity (MS-LZC) is defined as the compressed size (in byte) of a  
17 microstate sequence. For each subject and condition, the MS-LZC was computed for each  
18 extracted window from the full microstate sequence, using a sliding-window approach (5s window  
19 length, 4s window overlap) to ensure a smooth and representative output. The MS-LZC for windows  
20 overlapping with two or more conditions were discarded to avoid discontinuities. MS-LZC for each  
21 subject was divided by the baseline MS-LZC amplitude (BASE condition). The grand average MS-  
22 LZC for each condition was obtained by averaging the normalized MS-LZC across subjects (**Fig.**  
23 **7, Panel A**). Statistical comparisons across conditions were then performed here in a similar way  
24 as explained in **Section "L"** above. A different representation of MS-LZC over time was obtained  
25 instead by averaging the LZC time course across subjects after time-warping each to a common  
26 median length (**Fig. 7, Panel B**)

## 27 28 **Results**

### 29 30 ***A. From fully alert to surgical anesthesia***

31 Twenty-three patients scheduled for minor elective surgery volunteered for the experiment. Their  
32 consciousness state was assessed with the Observer Assessment of Alertness/Sedation (OAA/S)  
33 from fully awake with initiated Propofol injection, to OASS0/DEEP – fully anesthetized – (**Table 1**).  
34 All patients reached DEEP (surgical anesthesia) within  $20 \pm 6$  minutes when infused with increasing  
35 target effect-site concentrations of propofol ranging from 0.5  $\mu\text{g/ml}$  to 5.0  $\mu\text{g/ml}$ , and additional  
36 sufentanil (and rocuronium) as soon as OASS 1 was reached (**Fig. 1**).

### 37 38 ***B. Several criteria reveal five salient canonical microstates***

39 Careful preprocessing (see **Methods**) and microstate analysis of the EEG data continuously  
40 collected during the experiment revealed five canonical microstates (named with letters A through  
41 E), best explaining the data according to a Meta-criterion (Brechet et al., 2020). Microstates (MS)  
42 had different spatial distributions. The spatial correlation across different microstates within each  
43 condition (e.g., MS A, and MS B within “BASE”) and across conditions (e.g., MS A for “BASE” and  
44 MS B for “DEEP”) was always lower than the spatial correlation across paired microstates conditions  
45 (e.g., MS A for BASE and MS A for “DEEP”) (**Fig. 4, Panel A**). The average spatial correlation ( $x$

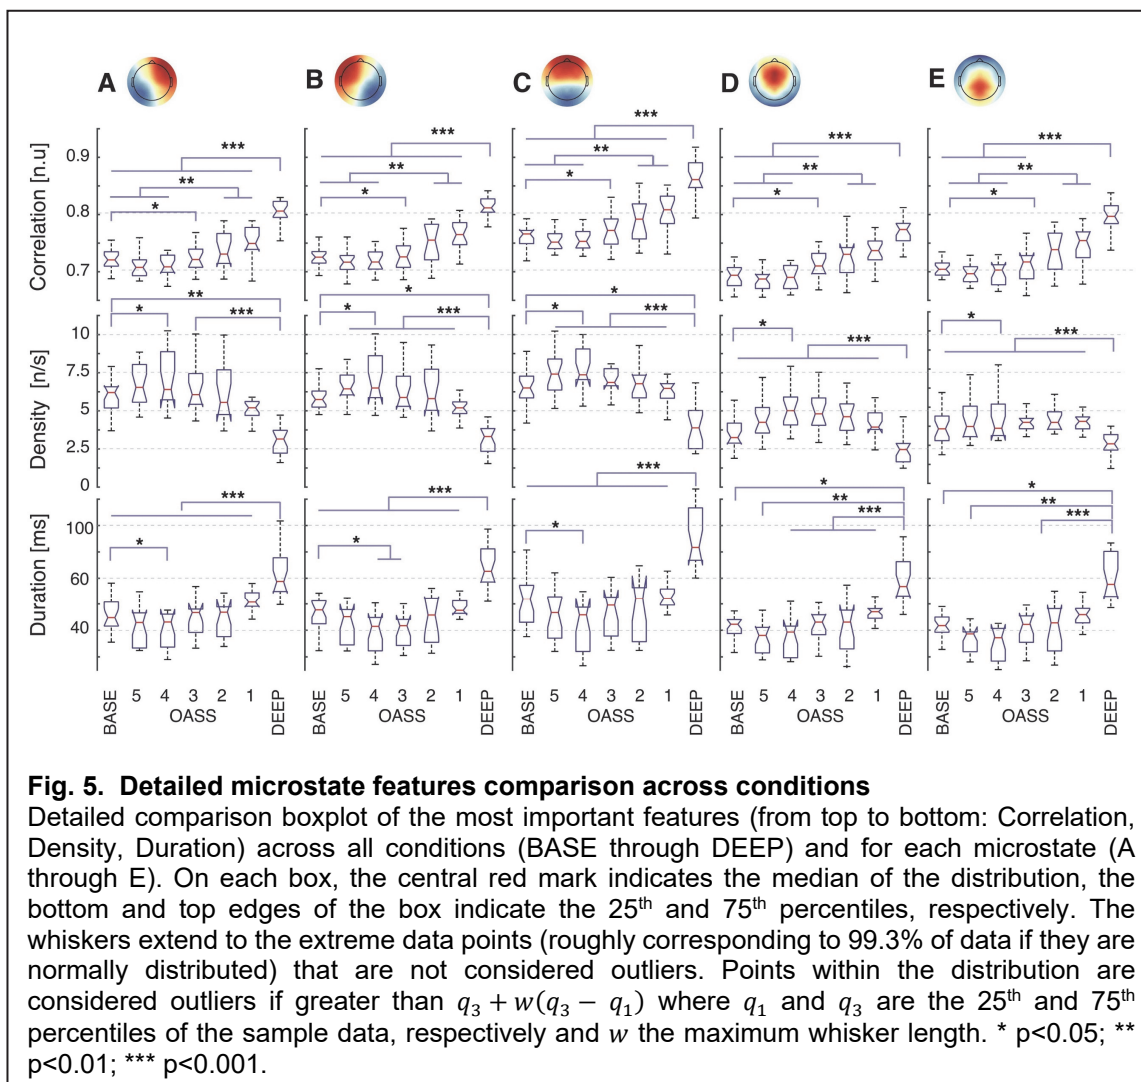

1 100) across conditions of paired microstates was  $98.3 \pm 0.8$  (microstate A),  $98.4 \pm 0.7$  (microstate  
2 B),  $98.3 \pm 0.6$  (microstate C),  $98.4 \pm 0.9$  (microstate D),  $91.1 \pm 7.4$  (microstate E) (**Fig. 4, Panel B**).

3

#### 4 **C. Correlation, density, and duration successfully explain data**

5 The maximum statistical separation between BASE and DEEP conditions was found for three  
6 microstate features (Correlation, Density, Duration). These features were compared across all  
7 OASS conditions, aiming not just to describe the starting and ending point but the whole path to  
8 unconsciousness (**Fig. 5**).

9

10 All features exhibit a nonlinear path to unconsciousness. The *spatial correlation* of the  
11 microstate maps fitted to the ongoing EEG in DEEP condition was significantly higher not only with  
12 respect to BASE but also regarding all other conditions – OASS 5, OASS 4, OASS 3, OASS 2,  
13 OASS 1 for microstates A, B and C ( $p < 0.001$ ); BASE, OASS 5, OASS 4, OASS 3 for microstates  
14 D and E. A significant difference was found between OASS 2, OASS 1, and BASE for all  
15 microstates ( $p < 0.01$ ). Interestingly, significant differences ( $p < 0.05$ ) could already be seen between  
BASE and OASS 3. However, although without reaching significance, the spatial correlation first

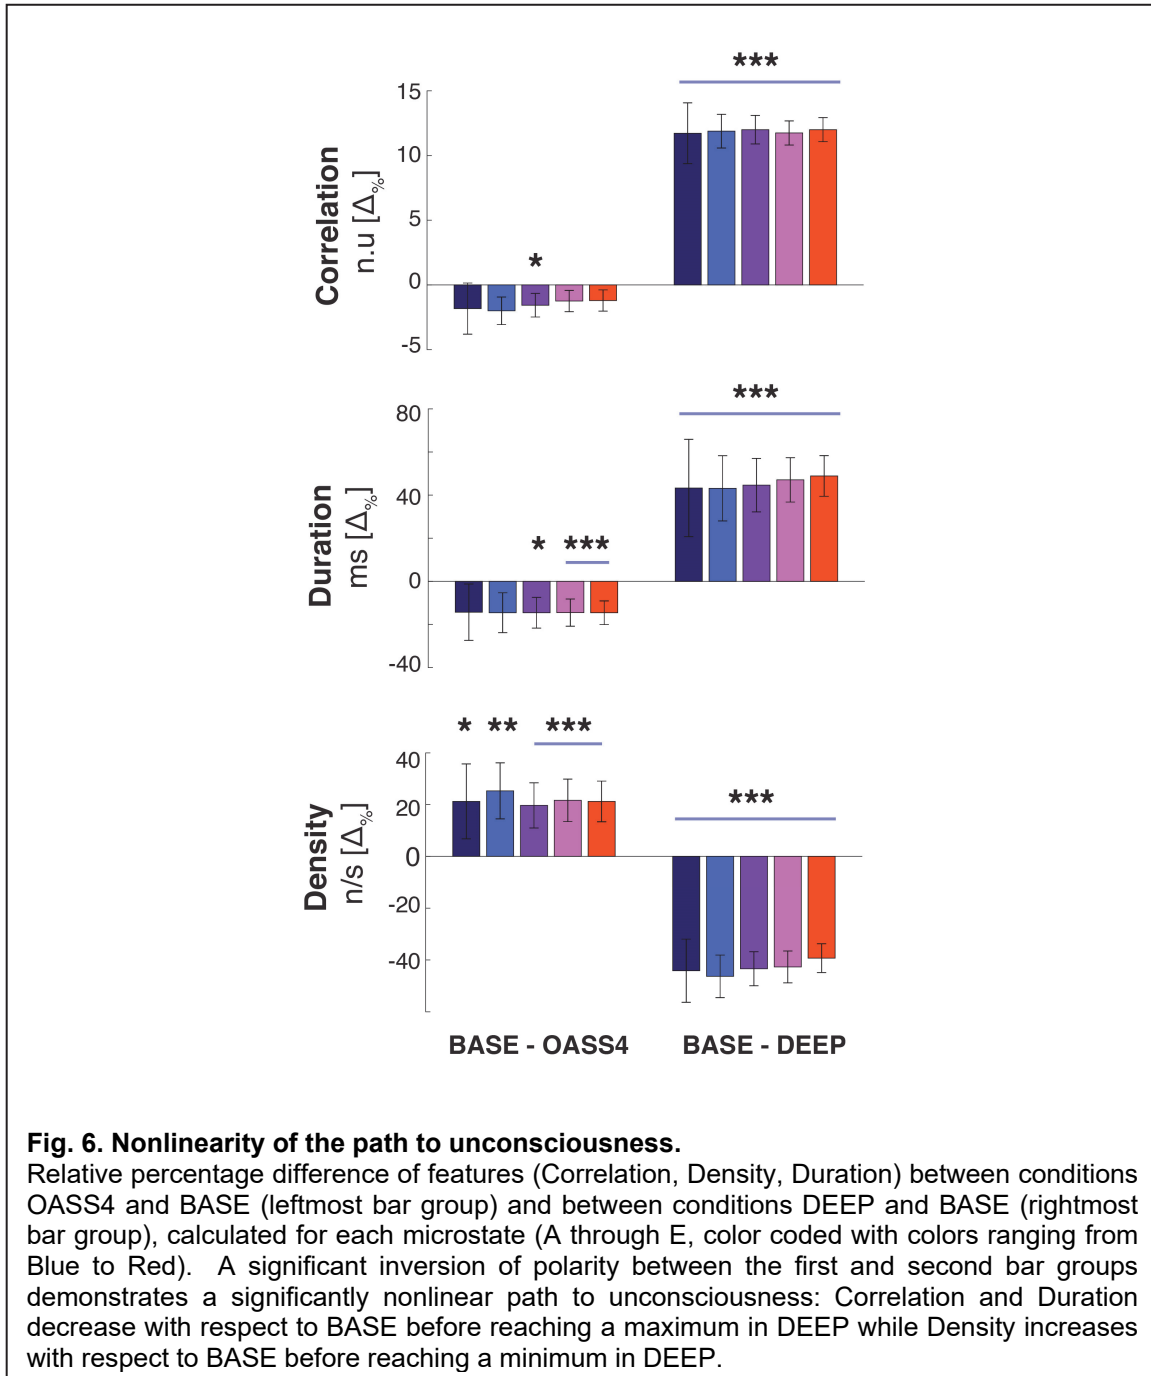

- 1 decreased at the beginning of the path to unconsciousness, reaching the minimum at OASS 4 and
- 2 then steadily increased until the maximum was reached with deep anesthesia.
- 3 Similarly, the *density* (number of occurrences of a microstate per second) of all microstates
- 4 was lower for DEEP with respect to any other condition. However, as for the other microstate
- 5 features, microstate density first increased at the beginning of Propofol administration before it

1 decreased. This initial increase reached significance for all microstates at OASS 4 when compared  
2 to BASE.

3 The *duration* of all microstates was significantly higher for DEEP with respect to all other  
4 conditions (BASE through OASS 1), with  $p < 0.001$  for microstates A, B, and C. As for the other  
5 parameters, a U-shape behavior was observed with an initial decrease of the duration up to OASS  
6 4, reaching significance ( $p < 0.05$ ) for microstates A and B compared to BASE, before steadily  
7 increasing from OASS 4 through DEEP.

#### 9 **D. A significantly nonlinear path from fully alert to surgical anesthesia**

10 All three microstate features showed a U-shaped behavior from awake to deep anesthesia. To  
11 further explore this phenomenon, relative normalized differences of the microstate features were  
12 calculated (**Fig. 6**). This difference was negative for BASE – OASS 4, significant for the *spatial*  
13 *correlation* (Microstate C:  $p < 0.05$ ) and *duration* (microstate C:  $p < 0.05$ , microstates D and E:  
14  $p < 0.001$ ), and positive for BASE – DEEP, significant ( $p < 0.001$ ) for *spatial correlation* and *duration*  
15 for all microstates. On the contrary, microstate *density* exhibited a positive BASE – OASS 4  
16 difference (microstate A:  $p < 0.05$ , microstate B:  $p < 0.01$ , microstates C,D,E:  $p < 0.001$ ) and negative  
17 BASE – DEEP difference (all microstates  $p < 0.001$ ), suggesting a nonlinear path to  
18 unconsciousness from BASE to DEEP (first a decrease, then an increase for spatial correlation and  
19 duration, vice versa for density).

#### 21 **E. “Mild” and “deep” sedation respectively increase and decrease microstate complexity**

22 Finally, based on the microstates sequence, we calculated a novel feature, the Microstate  
23 Sequence Lempel Ziv Complexity (MS-LZC), that captures the level of compressibility (size  
24 reduction) of a fixed-length sequence, expressed in kbit/s. An increase in this complexity value  
25 would indicate a more heterogeneous succession of the different microstates, while decreased  
26 complexity would reflect simpler and repetitive microstate sequences. Grand-average MS-LZC  
27 analysis (**Fig. 7, Panel A**) revealed a nonlinear path to unconsciousness with a MS-LZC increase  
28 (from BASE to OASS 4 and OASS 3) followed by an MS-LZC decrease (OASS 3,2,1, DEEP).  
29 Significance (see methods) was reached (i) between BASE and OASS 4 ( $p < 0.05$ ), (ii) between  
30 DEEP and BASE, OASS 5,4,3 ( $p < 0.001$ ), (iii) between DEEP and OASS 2 ( $p < 0.01$ ), (iv) between  
31 DEEP and OASS 1 ( $p < 0.001$ ). Complexity over time (**Fig. 7, Panel B**) also confirms a sustained  
32 MS-LZC, decreasing steadily towards DEEP. A nonlinear behavior was observed for all subjects  
33 (except s2, s3, s4, where conditions were not annotated), with a MS-LZC increase followed by a  
34 MS-LZC decrease. However, three of them (s7, s17, s23) reached a higher complexity during  
35 DEEP condition compared to BASE.

#### 37 **Discussion**

38 By applying the new method of microstate sequence complexity (MS-LZC), along with the classical  
39 microstate features, our study revealed a distinct “U-shaped” path of propofol-anesthetized patients  
40 from fully alert (baseline) to surgical anesthesia. Our results demonstrate the value of microstates  
41 in capturing and synthesizing complex dynamical features of whole-brain networks in the sub-  
42 second time range that characterizes different states of consciousness.

43 Interestingly, we found a reversal effect of propofol from baseline to light sedation and from  
44 sedation to surgical anesthesia. This peculiar behavior is probably linked to the paradoxical  
45 excitation effect of propofol and other anesthetics at a lower dose (Ching et al., 2010; McCarthy et  
46 al., 2008), marked by disinhibition, loss of affective control (Fulton and Mullen, 2000), and seizure-  
47 like phenomena ranging from involuntary movements to generalized tonic-clonic seizures (Walder



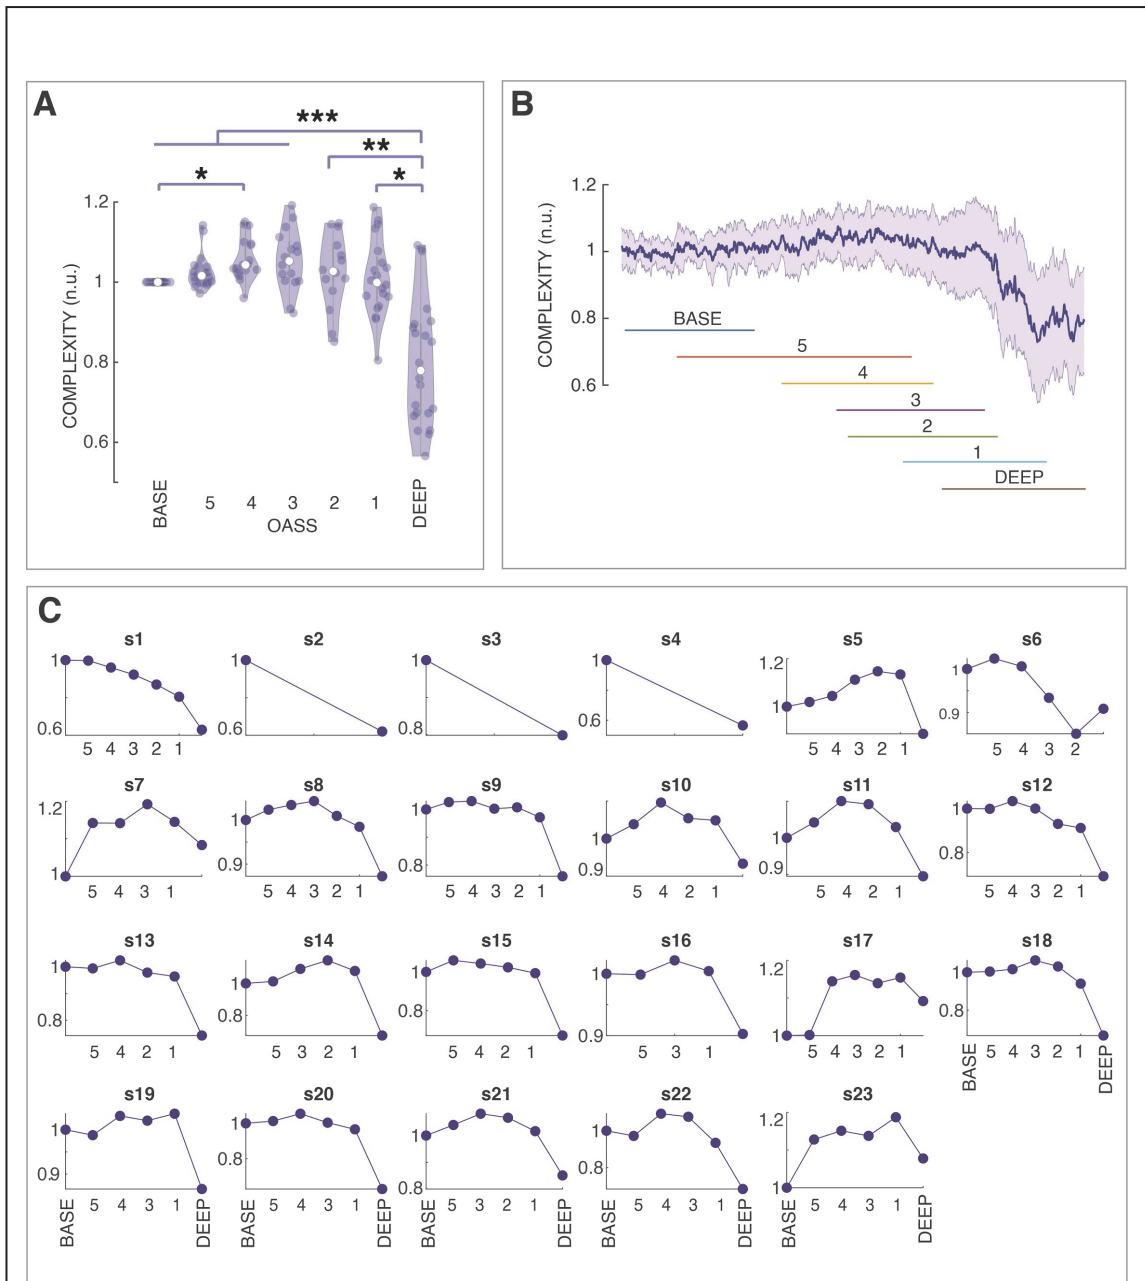

**Fig. 4. Lempel-Ziv Complexity Analysis of Microstate sequences.**

**Panel A:** violin distribution of the normalized Microstate Lempel-Ziv Complexity (MS-LZC) of microstates across subjects for each OASS condition (BASE through DEEP) and statistical significance of comparisons (\*  $p < 0.05$ ; \*\*  $p < 0.01$ ; \*\*\*  $p < 0.001$ ). **Panel B:** Grand-average (bold blue line) and standard deviation (blue shading) of the time-warped MS-LZC across subjects. The colored lines represent the minimum and maximum span in the common warped time axis for each condition (BASE – OASS5,4,3,2,1 - DEEP). **Panel C:** Single-subject average normalized MS-LZC for each condition

1 et al., 2002). In our study, this enhanced level of excitability is characterized by more diverse  
 2 spatiotemporal EEG patterns (highlighted by shorter duration, higher density, and lower correlation

1 of the microstates, as well as increased complexity of the microstate sequences). Therefore, these  
2 results suggest the presence of an intermediate brain state as compared to a fully awake condition,  
3 during which patients enter a state of hyperexcitability with increased complexity and probably  
4 greater awareness of both inside and outside stimuli. This state is also described under psilocybin  
5 as the "entropic brain" state (Carhart-Harris et al., 2014). Interestingly, this hyperexcitability state  
6 seemed to protract until full loss of consciousness in three subjects (**Fig. 7, Panel C**).

7 By further increasing propofol dosage, the level of excitability decreases and preludes complete  
8 loss of consciousness. In terms of EEG microstates, this effect is characterized by increasing  
9 duration, increasing correlation, decreasing the occurrence of the microstates, and reducing the  
10 complexity of the microstate sequences. These effects are reminiscent of the decreased excitability  
11 of the cortical networks due to enhanced GABAergic phasic and tonic currents induced by propofol  
12 (Dasilva et al., 2020; Orser et al., 1994). The effect was most pronounced at the stage of surgical  
13 anesthesia, where opioid analgesic sufentanil and the muscle relaxant rocuronium were added to  
14 reach complete unconsciousness.

15 The concept of fragmentation of consciousness in transiently stable brain states postulates  
16 that the non-continuous dynamics of these states are governed by "metastability" that hold the  
17 system in a critical balance and allow a flexible switch from one state to another (Deco and Jirsa,  
18 2012; Jirsa et al., 1998; Tognoli and Kelso, 2014; Tononi et al., 1994). Any disturbance of this  
19 critical temporal balance of brain states, being increased or decreased, might cause alterations in  
20 the global state of consciousness. Our finding of a U-shaped behavior of the temporal  
21 characteristics of microstates further underlines the importance of optimal metastability between  
22 order and chaos. Increased complexity of the network dynamics, as seen in OASS 4 and decreased  
23 complexity as seen in deep anesthesia, lead first to altered states of consciousness represented  
24 by a hyper-excitation and second to complete unconsciousness. Interestingly, in the case of  
25 induction of these states by propofol, all microstates were similarly affected. This effect is in contrast  
26 to sleep that selectively changes the temporal characteristics of specific microstates. A recent study  
27 (Bréchet et al., 2020) showed that two EEG microstates (a frontal and occipital/thalamic one) were  
28 highly represented during NREM sleep than resting wake state. However, dreaming during NREM  
29 sleep was associated with a decrease in the occipital/thalamic microstate presence, while the  
30 frontal microstate increased during dreams. The authors venture that reducing the occipital  
31 microstate slow-wave activity may indicate local activations that account for remembered dreams  
32 with rich perceptual content. In contrast, the increase of the frontal microstate may account for the  
33 executive disconnection of the dreaming brain to maintain sleep. Notably, these dreams were  
34 remembered and could be recalled means that memory is not entirely lost during sleep. This result  
35 is in contrast to propofol-induced anesthesia, during which memory is lost. It has been shown that  
36 the effect of propofol on memory is different from the sedative effect (Veselis et al., 2001). It might  
37 be that this amnesic effect explains why all microstates, and thus all functional brain networks,  
38 were similarly affected by propofol.

39 Surgical anesthesia results in a highly significant increase in the spatial correlation of the  
40 microstate template maps with the ongoing EEG (from 0.7 to 0.8 – **Fig. 5**). This result further  
41 highlights a decrease in complexity brought forward by deep anesthesia. Few spatial filters (i.e., 5  
42 microstates) can better explain the ongoing EEG, in line with results suggesting a reduction in  
43 complexity to be a predictor of unconsciousness (Dasilva et al., 2020; Zhang et al., 2001).  
44 Considering that a winner-takes-all strategy was used to estimate microstate topographies (see  
45 **Methods**), an increased duration combined with increased spatial correlation is suggestive of  
46 longer-sustained and well-defined states slower-changing, simpler topographies, better correlated  
47 with smooth canonical microstate topographies. This effect could be attributed to the incidence of

1 slow waves during propofol-induced anesthesia comparable to slow waves during sleep (Murphy  
2 et al., 2011). These low-frequency oscillations are associated with neuronal bi-stability and  
3 impaired network interactions caused by disruption of communication in and/or among cortical brain  
4 regions (Bellesi et al., 2014). It has been suggested that the presence of the microstates during  
5 low-frequency activity (such as during NREM sleep) reflects a temporary process of suppression  
6 of functional integration between the nodes of the network that generated the corresponding  
7 microstate, thus a deactivation of the network (Brechet et al., 2020). Following this interpretation,  
8 the increased duration of all microstates during a loss of consciousness reflects a continuous  
9 deactivation of the networks. In contrast to NREM sleep, all microstates were similarly prolonged  
10 and better presented, while in NREM sleep, only 2 microstates changed compared to wakefulness  
11 (Brechet et al., 2020). Only during deep sleep stage N3, the duration of all microstates increases  
12 (Brodbeck et al., 2012). This effect indicates that loss of consciousness during anesthesia is not  
13 similar to sleep.

14 Regarding the MS-LZC method proposed, previous studies have used the Lempel-Ziv  
15 compression (LZC) algorithm to evaluate the complexity and diversity of EEG signals, either with a  
16 single-channel or a multichannel approach (Casali et al., 2013; Schartner et al., 2015). In the single-  
17 channel approach, a raw or preprocessed/filtered EEG channel is divided into epochs, de-trended,  
18 and transformed with a Hilbert transform to estimate its envelope. The resulting signal is then  
19 binarized using a set threshold calculated as the mean value of the envelope itself: values of "1"  
20 and "0" are assigned to the time points respectively above or below said threshold, and the  
21 binarized sequence is then segmented into "binary words" by the LZC algorithm. The greater the  
22 number of "binary words", with respect to the number obtained after randomly shuffling the original  
23 binarized sequence, the greater the complexity of the epoch. The multichannel approach is similar,  
24 with the only difference that binarized sequences obtained from each EEG channel are  
25 concatenated before submitting them to the LZC algorithm. This method (or others following a  
26 similar procedure), however, presents several drawbacks. First, both single-channel and  
27 multichannel approaches are highly influenced by the preprocessing of EEG data. In fact, noisy  
28 channels originate maximally-random sequences that can greatly reduce the robustness of the  
29 complexity measure. Second, envelope binarization is not representative of the data structure as  
30 both oscillations above and below the threshold are lost. Third, the method may result in a different  
31 binarizing threshold for each epoch, potentially leading to very different complexity values, even for  
32 contiguous epochs, if, for instance a particular event or burst of noise modifies the threshold to  
33 either very high or low levels. Fourth, with the multichannel approach, concatenation of binarized  
34 sequences from different channels may introduce discontinuities that may artificially increase  
35 estimated complexity. For example if sequence "A (0,0,0,0)", with only one binary word of size 1,  
36 ("0") is concatenated to sequence B (1,1,1,1), with only one binary word of size 1 ("1"), its  
37 concatenation A+B (0,0,0,0,1,1,1,1) would be composed by two binary words of size "1" and one  
38 artifact binary word of size 2 ("01"). Finally, and most importantly, single-channel analysis is highly  
39 dependent on the recording reference, while the topographic analysis used for microstate  
40 segmentation is completely reference-free (Michel and Murray, 2012).

41 This study has two main limitations. First, in the absence of an objective, clinical tool that  
42 allows quantification of the degree of unconsciousness, we were using the OAAS scale as a  
43 surrogate measure of alertness. The OAAS scale has been validated for sedative drugs, but it  
44 cannot be used to clinically measure the depth of surgical anesthesia. We, therefore, added an  
45 artificial score (DEEP) to the scale in deepening the degree of sedation to a status that empirically  
46 corresponded to surgical anesthesia. Based on daily clinical practice, we assumed that thanks to  
47 the combination of propofol and a strong opioid, surgical anesthesia was reached, although that

1 state could not be quantified clinically. This also implies that, strictly speaking, our observations  
2 apply to different degrees of unconsciousness induced by propofol, with or without sufentanil.  
3 Second, the pathway from fully alert (BASE) to loss of consciousness (LOC) and then further to  
4 surgical anesthesia (DEEP) is a continuum. For instance, the end of “deep sedation” and the  
5 beginning of “surgical anesthesia” is not clearly defined. Also, this continuum is likely to depend on  
6 individual factors, such as a subject’s co-morbidities and the drugs used for sedation.

7 Overall, microstate sequence complexity and microstate features offer a granular and  
8 synthetic description that opens new perspectives on the neural correlates of transitions to loss of  
9 consciousness. The performance of current loss of consciousness decoders may be improved by  
10 considering the existence of a paradoxical excitation brain state, for example, by tracking the  
11 change of the slope in complexity rather than simply comparing features with the baseline condition.  
12 In future works, the microstate features and sequence complexity (see **Fig. 7, Panel C**) may also  
13 be used to track the path of recovery from loss of consciousness, explore possible relations to intra-  
14 operative awareness and sensitivity to propofol, or prevent propofol overdosing.

## 15 **Appendix**

### 16 **Full inclusion/exclusion criteria.**

17 Subjects satisfied all of the following criteria to be enrolled in the study:

- 18 • Adult patients (age between 18 and 40 years)
- 19 • Right-handed
- 20 • American Society of Anesthesiology (ASA) status I-II
- 21 • Scheduled for elective surgery requiring a general anesthetic
- 22 • Able to read and understand the information sheet and to sign and date the consent form.

23 Subjects who potentially met any of the following criteria were excluded from participating in the  
24 study:

- 25 • Patients with significant cardio-respiratory or another end-organ disease (renal or hepatic  
26 disease influencing metabolism or elimination of study drugs).
- 27 • Patients with depression, neurological or psychiatry disorders.
- 28 • Dementia or inability to understand the informed consent.
- 29 • Patients with a history of esophageal reflux, hiatus hernia, or any other condition requiring  
30 rapid sequence induction of anesthesia.
- 31 • History of drugs (opioids) or alcohol abuse.
- 32 • Patients with a body mass index  $>30 \text{ kg m}^{-2}$ .
- 33 • Left-handed patients
- 34 • History of allergy or hypersensitivity to Propofol.

35  
36  
37

## 1 **References**

- 2 Andreou, C., Faber, P.L., Leicht, G., Schoettle, D., Polomac, N., Hanganu-Opatz, I.L., Lehmann,  
3 D., Mulert, C., 2014. Resting-state connectivity in the prodromal phase of schizophrenia: insights  
4 from EEG microstates. *Schizophr Res* 152, 513-520.
- 5 Artoni, F., Delorme, A., Makeig, S., 2018. Applying dimension reduction to EEG data by Principal  
6 Component Analysis reduces the quality of its subsequent Independent Component  
7 decomposition. *Neuroimage* 175, 176-187.
- 8 Artoni, F., Fanciullacci, C., Bertolucci, F., Panarese, A., Makeig, S., Micera, S., Chisari, C., 2017.  
9 Unidirectional brain to muscle connectivity reveals motor cortex control of leg muscles during  
10 stereotyped walking. *Neuroimage* 159, 403-416.
- 11 Artoni, F., Menicucci, D., Delorme, A., Makeig, S., Micera, S., 2014. RELICA: a method for  
12 estimating the reliability of independent components. *Neuroimage* 103, 391-400.
- 13 Baars, B.J., 1997. *In the Theater of Consciousness: The Workspace of the Mind*. Oxford  
14 University Press.
- 15 Baars, B.J., 2002a. Atoms of thought. *Science and Consciousness Review* December, 1-2.
- 16 Baars, B.J., 2002b. The conscious access hypothesis: origins and recent evidence. *Trends Cogn*  
17 *Sci* 6, 47-52.
- 18 Bellesi, M., Riedner, B.A., Garcia-Molina, G.N., Cirelli, C., Tononi, G., 2014. Enhancement of  
19 sleep slow waves: underlying mechanisms and practical consequences. *Front Syst Neurosci* 8,  
20 208.
- 21 Bréchet, L., Brunet, D., Birot, G., Gruetter, R., Michel, C.M., Jorge, J., 2019. Capturing the  
22 spatiotemporal dynamics of self-generated, task-initiated thoughts with EEG and fMRI.  
23 *Neuroimage* 194, 82-92.
- 24 Brechet, L., Brunet, D., Perogamvros, L., Tononi, G., Michel, C.M., 2020. EEG microstates of  
25 dreams. *Sci Rep* 10, 17069.
- 26 Bréchet, L., Brunet, D., Perogamvros, L., Tononi, G., Michel, C.M., 2020. EEG microstates of  
27 dreams. *Scientific reports* 10, 1-9.
- 28 Brechet, L., Ziegler, D.A., Simon, A.J., Brunet, D., Gazzaley, A., Michel, C.M., 2021.  
29 Reconfiguration of Electroencephalography Microstate Networks after Breath-Focused, Digital  
30 Meditation Training. *Brain Connect*.
- 31 Bressler, S.L., Kelso, J.A., 2001. Cortical coordination dynamics and cognition. *Trends Cogn Sci*  
32 5, 26-36.
- 33 Brodbeck, V., Kuhn, A., von Wegner, F., Morzelewski, A., Tagliazucchi, E., Borisov, S., Michel,  
34 C.M., Laufs, H., 2012. EEG microstates of wakefulness and NREM sleep. *Neuroimage* 62, 2129-  
35 2139.
- 36 Brunet, D., Murray, M.M., Michel, C.M., 2011. Spatiotemporal analysis of multichannel EEG:  
37 CARTOOL. *Computational intelligence and neuroscience* 2011.

- 1 Carhart-Harris, R.L., Leech, R., Hellyer, P.J., Shanahan, M., Feilding, A., Tagliazucchi, E.,  
2 Chialvo, D.R., Nutt, D., 2014. The entropic brain: a theory of conscious states informed by  
3 neuroimaging research with psychedelic drugs. *Front Hum Neurosci* 8, 20.
- 4 Casali, A.G., Gosseries, O., Rosanova, M., Boly, M., Sarasso, S., Casali, K.R., Casarotto, S.,  
5 Bruno, M.-A., Laureys, S., Tononi, G., 2013. A theoretically based index of consciousness  
6 independent of sensory processing and behavior. *Science Translational Medicine* 5, 198ra105-  
7 198ra105.
- 8 Casarotto, S., Comanducci, A., Rosanova, M., Sarasso, S., Fecchio, M., Napolitani, M., Pigorini,  
9 A., G. Casali, A., Trimarchi, P.D., Boly, M., 2016. Stratification of unresponsive patients by an  
10 independently validated index of brain complexity. *Annals of neurology* 80, 718-729.
- 11 Chambers, J.M., Cleveland, W.S., Kleiner, B., Tukey, P.A., 1983. Comparing data distributions.  
12 graphical methods for data analysis 62.
- 13 Changeux, J.-P., Michel, C.M., 2004. Mechanism of neural Integration at the Brain-scale Level.  
14 In: Grillner, S., Graybiel, A.M. (Eds.), *Microcircuits*. MIT Press, Cambridge, pp. 347-370.
- 15 Chernik, D.A., Gillings, D., Laine, H., Hendler, J., Silver, J.M., Davidson, A.B., Schwam, E.M.,  
16 Siegel, J.L., 1990. Validity and reliability of the Observer's Assessment of Alertness/Sedation  
17 Scale: study with intravenous midazolam. *Journal of clinical psychopharmacology*.
- 18 Ching, S., Cimenser, A., Purdon, P.L., Brown, E.N., Kopell, N.J., 2010. Thalamocortical model for  
19 a propofol-induced  $\alpha$ -rhythm associated with loss of consciousness. *Proceedings of the National  
20 Academy of Sciences* 107, 22665-22670.
- 21 Comolatti, R., Pigorini, A., Casarotto, S., Fecchio, M., Faria, G., Sarasso, S., Rosanova, M.,  
22 Gosseries, O., Boly, M., Bodart, O., 2019. A fast and general method to empirically estimate the  
23 complexity of brain responses to transcranial and intracranial stimulations. *Brain stimulation* 12,  
24 1280-1289.
- 25 Creaser, J., Ashwin, P., Postlethwaite, C., Britz, J., 2021. Noisy network attractor models for  
26 transitions between EEG microstates. *J Math Neurosci* 11, 1.
- 27 Dasilva, M., Camassa, A., Navarro-Guzman, A., Pazienti, A., Perez-Mendez, L., Zamora-Lopez,  
28 G., Mattia, M., Sanchez-Vives, M.V., 2020. Modulation of cortical slow oscillations and complexity  
29 across anesthesia levels. *Neuroimage*, 117415.
- 30 Deco, G., Cruzat, J., Kringelbach, M.L., 2019. Brain songs framework used for discovering the  
31 relevant timescale of the human brain. *Nature communications* 10, 1-13.
- 32 Deco, G., Jirsa, V.K., 2012. Ongoing cortical activity at rest: criticality, multistability, and ghost  
33 attractors. *J Neurosci* 32, 3366-3375.
- 34 Deco, G., Jirsa, V.K., McIntosh, A.R., 2011. Emerging concepts for the dynamical organization of  
35 resting-state activity in the brain. *Nature Reviews Neuroscience* 12, 43-56.
- 36 Dehaene, S., Kerszberg, M., Changeux, J.-P., 1998. A neuronal model of a global workspace in  
37 effortful cognitive tasks. *Proceedings of the National Academy of Sciences* 95, 14529-14534.



- 1 Dehaene, S., Sergent, C., Changeux, J.P., 2003. A neuronal network model linking subjective  
2 reports and objective physiological data during conscious perception. *Proc Natl Acad Sci U S A*  
3 100, 8520-8525.
- 4 Delorme, A., Makeig, S., 2004. EEGLAB: an open source toolbox for analysis of single-trial EEG  
5 dynamics including independent component analysis. *J Neurosci Methods* 134, 9-21.
- 6 Delorme, A., Palmer, J., Onton, J., Oostenveld, R., Makeig, S., 2012. Independent EEG sources  
7 are dipolar. *PLoS One* 7, e30135.
- 8 Ding, M., Bressler, S.L., Yang, W., Liang, H., 2000. Short-window spectral analysis of cortical  
9 event-related potentials by adaptive multivariate autoregressive modeling: data preprocessing,  
10 model validation, and variability assessment. *Biol Cybern* 83, 35-45.
- 11 Efron, R., 1970. The minimum duration of a perception. *Neuropsychologia* 8, 57-63.
- 12 Faber, P.L., Travis, F., Milz, P., Parim, N., 2017. EEG microstates during different phases of  
13 Transcendental Meditation practice. *Cogn Process* 18, 307-314.
- 14 Fulton, S.A., Mullen, K.D., 2000. Completion of upper endoscopic procedures despite paradoxical  
15 reaction to midazolam: a role for flumazenil? *Am J Gastroenterol* 95, 809-811.
- 16 Gui, P., Jiang, Y., Zang, D., Qi, Z., Tan, J., Tanigawa, H., Jiang, J., Wen, Y., Xu, L., Zhao, J.,  
17 2020. Assessing the depth of language processing in patients with disorders of consciousness.  
18 *Nat Neurosci*, 1-10.
- 19 Huys, R., Perdikis, D., Jirsa, V.K., 2014. Functional architectures and structured flows on  
20 manifolds: A dynamical framework for motor behavior. *Psychological review* 121, 302.
- 21 Jabès, A., Klencklena, G., Ruggiera, P., Michel, C.M., Lavenex, P.B., Lavenex, P., 2021.  
22 Resting-state EEG microstates parallel age-related differences in allocentric spatial working  
23 memory performance. *Brain Topography* in press.
- 24 James, W., 2007. *The principles of psychology*. Cosimo, Inc.
- 25 Jirsa, V.K., Fuchs, A., Kelso, J.A., 1998. Connecting cortical and behavioral dynamics: bimanual  
26 coordination. *Neural Comput* 10, 2019-2045.
- 27 Kindler, J., Hubl, D., Strik, W.K., Dierks, T., Koenig, T., 2011. Resting-state EEG in  
28 schizophrenia: auditory verbal hallucinations are related to shortening of specific microstates. *Clin*  
29 *Neurophysiol* 122, 1179-1182.
- 30 Koenig, T., Prichep, L., Lehmann, D., Sosa, P.V., Braeker, E., Kleinlogel, H., Isenhardt, R., John,  
31 E.R., 2002. Millisecond by millisecond, year by year: normative EEG microstates and  
32 developmental stages. *Neuroimage* 16, 41-48.
- 33 Kothe, C.A., Makeig, S., 2013. BCILAB: a platform for brain-computer interface development.  
34 *Journal of neural engineering* 10, 056014.
- 35 Lehmann, D., Faber, P.L., Galderisi, S., Herrmann, W.M., Kinoshita, T., Koukkou, M., Mucci, A.,  
36 Pascual-Marqui, R.D., Saito, N., Wackermann, J., Winterer, G., Koenig, T., 2005. EEG microstate  
37 duration and syntax in acute, medication-naive, first-episode schizophrenia: a multi-center study.  
38 *Psychiatry Res* 138, 141-156.

- 1 Lehmann, D., Ozaki, H., Pal, I., 1987. EEG alpha map series: brain micro-states by space-  
2 oriented adaptive segmentation. *Electroencephalography and clinical neurophysiology* 67, 271-  
3 288.
- 4 Libet, B., 1981. The experimental evidence of subjective referral of a sensory experience  
5 backward in time. *Philosophy Sci.* 48, 182-197.
- 6 Llinas, R.R., Ribary, U., 1998. Temporal conjunction in thalamocortical transactions. *Adv Neurol*  
7 77, 95-102; discussion 102-103.
- 8 Lundqvist, M., Rose, J., Herman, P., Brincat, S.L., Buschman, T.J., Miller, E.K., 2016. Gamma  
9 and Beta Bursts Underlie Working Memory. *Neuron* 90, 152-164.
- 10 McCarthy, M.M., Brown, E.N., Kopell, N., 2008. Potential network mechanisms mediating  
11 electroencephalographic beta rhythm changes during propofol-induced paradoxical excitation.  
12 *Journal of Neuroscience* 28, 13488-13504.
- 13 Meehan, T.P., Bressler, S.L., 2012. Neurocognitive networks: findings, models, and theory.  
14 *Neuroscience & Biobehavioral Reviews* 36, 2232-2247.
- 15 Michel, C.M., Brunet, D., 2019. EEG source imaging: a practical review of the analysis steps.  
16 *Frontiers in neurology* 10, 325.
- 17 Michel, C.M., Koenig, T., 2018. EEG microstates as a tool for studying the temporal dynamics of  
18 whole-brain neuronal networks: A review. *Neuroimage* 180, 577-593.
- 19 Michel, C.M., Murray, M.M., 2012. Towards the utilization of EEG as a brain imaging tool.  
20 *Neuroimage* 61, 371-385.
- 21 Milz, P., Faber, P.L., Lehmann, D., Koenig, T., Kochi, K., Pascual-Marqui, R.D., 2016. The  
22 functional significance of EEG microstates--Associations with modalities of thinking. *Neuroimage*  
23 125, 643-656.
- 24 Murphy, M., Bruno, M.A., Riedner, B.A., Boveroux, P., Noirhomme, Q., Landsness, E.C.,  
25 Brichant, J.F., Phillips, C., Massimini, M., Laureys, S., Tononi, G., Boly, M., 2011. Propofol  
26 anesthesia and sleep: a high-density EEG study. *Sleep* 34, 283-291A.
- 27 Murray, M.M., Brunet, D., Michel, C.M., 2008. Topographic ERP analyses: a step-by-step tutorial  
28 review. *Brain Topography* 20, 249-264.
- 29 Oostenveld, R., Praamstra, P., 2001. The five percent electrode system for high-resolution EEG  
30 and ERP measurements. *Clinical neurophysiology* 112, 713-719.
- 31 Orser, B., Wang, L., Pennefather, P., MacDonald, J., 1994. Propofol modulates activation and  
32 desensitization of GABAA receptors in cultured murine hippocampal neurons. *Journal of*  
33 *Neuroscience* 14, 7747-7760.
- 34 Panda, R., Bharath, R.D., Upadhyay, N., Mangalore, S., Chennu, S., Rao, S.L., 2016. Temporal  
35 Dynamics of the Default Mode Network Characterize Meditation-Induced Alterations in  
36 Consciousness. *Front Hum Neurosci* 10, 372.

- 1 Pascual-Marqui, R.D., Michel, C.M., Lehmann, D., 1995. Segmentation of brain electrical activity  
2 into microstates: model estimation and validation. *IEEE Transactions on Biomedical Engineering*  
3 42, 658-665.
- 4 Pavlov, I., 2013a. "7z Format". <http://www.7-zip.org/7z.html>.
- 5 Pavlov, I., 2013b. LZMA SDK <http://7-zip.org/sdk.html>.
- 6 Rabinovich, M., Volkovskii, A., Lecanda, P., Huerta, R., Abarbanel, H.D., Laurent, G., 2001.  
7 Dynamical encoding by networks of competing neuron groups: winnerless competition. *Phys Rev*  
8 *Lett* 87, 068102.
- 9 Rieger, K., Diaz Hernandez, L., Baenninger, A., Koenig, T., 2016. 15 Years of Microstate  
10 Research in Schizophrenia - Where Are We? A Meta-Analysis. *Front Psychiatry* 7, 22.
- 11 Schartner, M., Seth, A., Noirhomme, Q., Boly, M., Bruno, M.-A., Laureys, S., Barrett, A., 2015.  
12 Complexity of multi-dimensional spontaneous EEG decreases during propofol induced general  
13 anaesthesia. *PLoS One* 10, e0133532.
- 14 Schnider, T.W., Minto, C.F., Shafer, S.L., Gambus, P.L., Andresen, C., Goodale, D.B., Youngs,  
15 E.J., 1999. The influence of age on propofol pharmacodynamics. *The Journal of the American*  
16 *Society of Anesthesiologists* 90, 1502-1516.
- 17 Seedat, Z.A., Quinn, A.J., Vidaurre, D., Liuzzi, L., Gascoyne, L.E., Hunt, B.A.E., O'Neill, G.C.,  
18 Pakenham, D.O., Mullinger, K.J., Morris, P.G., Woolrich, M.W., Brookes, M.J., 2020. The role of  
19 transient spectral 'bursts' in functional connectivity: A magnetoencephalography study.  
20 *Neuroimage* 209, 116537.
- 21 Seitzman, B.A., Abell, M., Bartley, S.C., Erickson, M.A., Bolbecker, A.R., Hetrick, W.P., 2017.  
22 Cognitive manipulation of brain electric microstates. *Neuroimage* 146, 533-543.
- 23 Seth, A.K., Baars, B.J., 2005. Neural Darwinism and consciousness. *Conscious Cogn* 14, 140-  
24 168.
- 25 Sherman, M.A., Lee, S., Law, R., Haegens, S., Thorn, C.A., Hamalainen, M.S., Moore, C.I.,  
26 Jones, S.R., 2016. Neural mechanisms of transient neocortical beta rhythms: Converging  
27 evidence from humans, computational modeling, monkeys, and mice. *Proc Natl Acad Sci U S A*  
28 113, E4885-4894.
- 29 Shi, W., Li, Y., Liu, Z., Li, J., Wang, Q., Yan, X., Wang, G., 2020. Non-Canonical Microstate  
30 Becomes Salient in High Density EEG During Propofol-Induced Altered States of Consciousness.  
31 *Int J Neural Syst* 30, 2050005.
- 32 Silverman, B.W., 1986. *Density estimation for statistics and data analysis*. CRC press.
- 33 Smith, I., Kranke, P., Murat, I., Smith, A., O'Sullivan, G., Søreide, E., Spies, C., 2011.  
34 Perioperative fasting in adults and children: guidelines from the European Society of  
35 Anaesthesiology. *European Journal of Anaesthesiology (EJA)* 28, 556-569.
- 36 Stefan, S., Schorr, B., Lopez-Rolon, A., Kolassa, I.T., Shock, J.P., Rosenfelder, M., Heck, S.,  
37 Bender, A., 2018. Consciousness Indexing and Outcome Prediction with Resting-State EEG in  
38 Severe Disorders of Consciousness. *Brain Topogr* 31, 848-862.

- 1 Strelets, V., Faber, P.L., Golikova, J., Novototsky-Vlasov, V., Koenig, T., Gianotti, L.R., Gruzelier,  
2 J.H., Lehmann, D., 2003. Chronic schizophrenics with positive symptomatology have shortened  
3 EEG microstate durations. *Clin Neurophysiol* 114, 2043-2051.
- 4 Tognoli, E., Kelso, J.A., 2014. The metastable brain. *Neuron* 81, 35-48.
- 5 Tomescu, M., Rihs, T., Roinishvili, M., Karahanoglu, F., Schneider, M., Menghetti, S., Van De  
6 Ville, D., Brand, A., Chkonia, E., Eliez, S., Herzog, M., Michel, C., Cappe, C., 2015.  
7 Schizophrenia patients and 22q11.2 deletion syndrome adolescents at risk express the same  
8 deviant patterns of resting state EEG microstates: A candidate endophenotype of schizophrenia.  
9 *Schizophrenia Research: Cognition* 2, 159-165.
- 10 Tomescu, M.I., Rihs, T.A., Rochas, V., Hardmeier, M., Britz, J., Allali, G., Fuhr, P., Eliez, S.,  
11 Michel, C.M., 2018. From swing to cane: Sex differences of EEG resting-state temporal patterns  
12 during maturation and aging. *Dev Cogn Neurosci* 31, 58-66.
- 13 Tononi, G., Boly, M., Massimini, M., Koch, C., 2016. Integrated information theory: from  
14 consciousness to its physical substrate. *Nature Reviews Neuroscience* 17, 450-461.
- 15 Tononi, G., Sporns, O., Edelman, G.M., 1994. A measure for brain complexity: relating functional  
16 segregation and integration in the nervous system. *Proc Natl Acad Sci U S A* 91, 5033-5037.
- 17 Veselis, R.A., Reinsel, R.A., Feshchenko, V.A., 2001. Drug-induced amnesia is a separate  
18 phenomenon from sedation: electrophysiologic evidence. *Anesthesiology* 95, 896-907.
- 19 Vidaurre, D., Hunt, L.T., Quinn, A.J., Hunt, B.A.E., Brookes, M.J., Nobre, A.C., Woolrich, M.W.,  
20 2018. Spontaneous cortical activity transiently organises into frequency specific phase-coupling  
21 networks. *Nat Commun* 9, 2987.
- 22 Walder, B., Tramer, M.R., Seeck, M., 2002. Seizure-like phenomena and propofol: a systematic  
23 review. *Neurology* 58, 1327-1332.
- 24 Williamson, S.J., Kaufman, L., Curtis, S., Lu, Z.L., Michel, C.M., Wang, J.Z., 1996. Neural  
25 substrates of working memories are revealed magnetically by the local suppression of alpha  
26 rhythm. *Electroencephalogr Clin Neurophysiol Suppl* 47, 163-180.
- 27 Zanesco, A.P., King, B.G., Skwara, A.C., Saron, C.D., 2020. Within and between-person  
28 correlates of the temporal dynamics of resting EEG microstates. *Neuroimage* 211, 116631.
- 29 Zanesco, A.P., Skwara, A.C., King, B.G., Powers, C., Wineberg, K., Saron, C.D., 2021.  
30 Meditation training modulates brain electric microstates and felt states of awareness. *Hum Brain*  
31 *Mapp*.
- 32 Zhang, X.-S., Roy, R.J., Jensen, E.W., 2001. EEG complexity as a measure of depth of  
33 anesthesia for patients. *IEEE Transactions on Biomedical Engineering* 48, 1424-1433.

34

### 35 **Acknowledgments**

36 The work was supported by the Swiss National Science Foundation (grant No. 320030\_184677)  
37 and by the National Center of Competence in Research (NCCR) 'SYNAPSY - The Synaptic Bases  
38 of Mental Diseases' (SNF, grant n° 51AU40\_125759). It was also supported by the Development  
39 Fund of the Medical Directories of the Geneva University Hospitals. We want to thank the research  
40 nurses, Ms. Béatrice Gil-Wey, Ms. Claudine Carera, and Mr. Patrick Huwiler, for their outstanding

1 work. We acknowledge access to the facilities and expertise of the CIBM Center for Biomedical  
2 Imaging, a Swiss research center of excellence founded and supported by Lausanne University  
3 Hospital (CHUV), University of Lausanne (UNIL), Ecole polytechnique fédérale de Lausanne  
4 (EPFL), University of Geneva (UNIGE) and Geneva University Hospitals (HUG).

5 **Author Contributions:**

6 JM, CL, and MRT were responsible for patient recruitment and the clinical care of the patients  
7 during the recordings. JM, JB, CL, MRT and CMM designed the study. JB recorded the data. FA,  
8 developed the processing algorithms and analyzed the data. CMM supervised the analysis  
9 activities. MS and CMM contributed critical feedback to the data analysis and presentation of the  
10 results. FA, LB and CMM wrote the manuscript. All authors corrected and commented on the  
11 manuscript.

12 **Competing Interests:** There are no competing interests pertaining to this manuscript

13
